# Supplementary material for: Axl-148b chimeric aptamers inhibit breast cancer and melanoma progression
Source: Int J Biol Sci. 2020 Feb 10;16(7):1238–51. doi: 10.7150/ijbs.39768 (PMC7053324; doi:10.7150/ijbs.39768)

## SUPPLEMENTARY TABLE AND FIGURE LEGENDS

**Table S1-** miR-148b-3p or U44 Cts  $\pm$  SD and  $\Delta$ Ct  $\pm$  SD for the different cell lines referring to Fig. S2. SD= Standard Deviation.  $\Delta$ Ct=miR-148b-3p-U44.

**Figure S1 – Axl-148b structure, annealing, stability and binding to AXL.** (A) Schematic representation of the axl-148b aptamer conjugate. (B) Representative image of non-denaturing polyacrylamide gel electrophoresis showing 3P or 5P miR-148b oligonucleotide sequences and axl aptamers or axl-148b conjugates, stained with ethidium-bromide. Proper annealing was checked for every aptamer preparation. (C) Representative image of non-denaturing polyacrylamide gel electrophoresis showing axl-148b conjugate (4  $\mu$ M) stability in presence of 80% human serum for the indicated times (hours=h), stained with ethidium-bromide. (B-C) Referral= 1kb ladder DNA. (D) Binding of 400 nmol/L of axl or axl-148b conjugates on A549 cells measured by qRT-PCR after 30 min of incubation.

**Figure S2 – AXL, miR-148b or let-7g expression in tumor cells treated or not with axl, axl-148b, scr-148b or axl-let-7g molecules.** (A) qRT-PCR analysis of AXL mRNA levels in AXL<sup>+</sup> A549 lung cancer cells, MA-2, MC-1 melanoma cells and MDAMB231, 4175-TGL breast cancer cells or AXL<sup>-</sup> SKBR3 breast cancer cells. Results are shown as fold changes (mean $\pm$ SD) relative to A549 cells, normalized on GAPDH levels. Two experiments were performed and a representative one is shown. (B-G) qRT-PCR analysis for miR-148b-3p (indicated as miR-148b) (B-F) or let-7g (G) expression for the indicated cell lines left untreated (controls = ctrl) or treated with 400 nmol/L of axl, axl-148b, scr-148b or axl-let7g aptamers. Alternatively, cells were transfected with 75 nmol/L of miR-148b precursor (pre-148b) or its negative control (pre-ctrl). Results are shown as fold changes (mean $\pm$ SD) relative to controls (ctrl or pre-ctrl), normalized on U6 or U44 small nucleolar RNA levels. 2 experiments (with triplicates) were performed and a representative one is

shown. scr= scramble. ns = not significant; \*  $p < 0.05$ , \*\*  $p < 0.01$ , \*\*\*  $p < 0.001$ . SD = standard deviation.

**Figure S3 – Axl-148b conjugate inhibits tumor cell movement in AXL<sup>+</sup>, but not in AXL<sup>-</sup> tumor cells.** (A-D) Transwell assays were used to evaluate invasion through matrigel (A-B) or migration (C-D) for AXL<sup>+</sup> 4175-TGL, MA-2 and A549 or AXL<sup>-</sup> SKBR3 cells left untreated (controls = ctrl) or treated with 400 nmol/L of axl, axl-148b or scr-148b aptamers as indicated. Alternatively, cells were transfected with 75 nmol/L of miR-148 precursor (pre-148b) or its negative control (pre-ctrl). Representative pictures of invaded/migrated cells are shown on top of histograms referring to the ratio of mean $\pm$ SEM of the area covered by invaded/migrated versus plated tumor cells. At least 2 independent experiments (with triplicates) were performed and representative results are shown. scr= scramble. ns = not significant; \*  $p < 0.05$ , \*\*  $p < 0.01$ , \*\*\*  $p < 0.001$ ; SEM = Standard Error of Mean; scale bar = 50  $\mu$ m (A-D).

**Figure S4 – Axl-148b conjugate does not significantly affect tumor cell growth.** (A-H) Proliferation (A-B, E-F) or cell viability (C-D, G-H) of 4175-TGL (A-D) or MA-2 (E-H), cells left untreated (controls=ctrl) or treated with 400 nmol/L of axl, axl-148b or scr-148b aptamers. Alternatively, cells were transfected with 75 nmol/L of miR-148b precursor (pre-148b) or its negative control (pre-ctrl). Results are indicated as mean $\pm$ SD of the proliferation or cell viability ratio versus plated cells, measured by optical density at 0-96h. At least 2 independent experiments (with triplicates) were performed and representative results are shown. scr= scramble; SD = Standard Deviation.

**Figure S5– Axl-148b conjugate inhibits formation and growth of mammospheres derived from AXL<sup>+</sup> tumor cells.** (A) Experimental scheme related to mammosphere assays for 4175-TGL breast cancer cells plated and grown in suspension for 5 days with no treatment, dissociated at day 5, re-plated and treated with 200/400 nmol/L of axl or axl-148b aptamers at day 5, 8 and 10, as indicated (numbers with squares) and evaluated at day 12. (B) qRT-PCR analysis for miR-148b expression in 4175-TGL derived-mammospheres left untreated (controls = ctrl) or treated with 200/400 nmol/L of axl or axl-148b aptamers. Results are shown as fold changes (mean±SD of triplicates) relative to controls (ctrl), normalized on U44 small nucleolar RNA levels. (C) Box-and-whisker plots of mammosphere number is shown, referring to 50 µl volume. (D) Representative images of mammospheres are presented on top of box-and-whisker plots referring to sphere dimensions as mean±SEM of sphere length (µm); black lines correspond to length measurements. (E) FACS analysis was used to evaluate the percentage (%) of PKH26 positive cells (versus total) in 4175-TGL derived-mammospheres at day 12, following dye treatment at day 5, shown as mean±SEM in box-and-whisker plots. For all results, 2 experiments with triplicates were performed and representative ones are shown. ns = not significant; \*  $p < 0.05$ , \*\*  $p < 0.01$ , \*\*\*  $p < 0.001$ ; SEM = Standard Error of Mean; scale bar = 25 µm (D).

**Figure S6- Axl-148b conjugate induces primary tumor necrosis/apoptosis and prevents melanoma dissemination in mice.** (A) Scheme of the experiment: Red fluorescent (RFP-expressing) MA-2 cells were injected into the flank of NOD/SCID/IL2R null mice and PBS or axl-148b aptamers were administered into the tumor starting at day 12 post-injection when tumors were palpable, (3 treatments/week, 300 pmol in 100 µl, 9 injections in total, as indicated) CTCs or primary tumors growth characteristics were analyzed 32 days after tumor-cell injections. (B) FFPE sections of primary tumors were stained with H&E and necrotic areas evaluated: representative images are shown on top of box-and-whisker plots presenting the percentage (%) of necrotic (delimited) versus total areas shown as mean±SEM for the indicated number (n) of mice. (C-D)

Primary tumors were stained by IHC with Cleaved Caspase-3 (C) or Ki-67 (D) antibodies and nuclei were counterstained with Hematoxylin (blue): representative images are shown on top of box-and-whisker plots presenting the percentage (%) of positive versus total cells shown as mean $\pm$ SEM for the indicated number (n) of mice (10 fields/each mouse were evaluated). (E) Evaluation of CTCs: representative images are presented on top of box-and-whisker plots representing the total number of RFP-positive cells obtained from blood (32 days post-injection), grown in culture for 7 days, shown as mean $\pm$ SEM for the indicated number (n) of mice. FFPE: Formalin-Fixed, Paraffin Embedded; arrows point to positive cells; IHC = immunohistochemistry; H&E = Hematoxylin & Eosin; CTCs = circulating tumor cells; \*  $p < 0.05$ , \*\*  $p < 0.01$ , \*\*\*  $p < 0.001$ ; SEM = Standard Error of Mean; scale bar = 100  $\mu$ m (B), 25  $\mu$ m (C-D), 50  $\mu$ m (E),

**Figure S7 - AXL expression in primary tumors and metastases following axl-148b conjugate administration.** (A-E) 4175-TGL cells in culture (A), or in primary tumors (B-D) or metastases (E), following primary tumor treatments as in Figure 5A, were stained with anti-AXL antibody by IHC and nuclei were counterstained with Hematoxylin (blue): representative images are shown on top of box-and-whisker plots representing the percentage (%) of AXL positive versus total cells shown as mean $\pm$ SEM for 5 or 10 fields/mouse. (F) qRT-PCR analysis for miR-148b expression in primary tumors treated as in Figure 5A. Results are shown as fold changes (mean $\pm$ SD) relative to controls (PBS), normalized on U6 small nucleolar RNA levels. 2 experiments (with triplicates) were performed and a representative one is shown. IHC = immunohistochemistry; n=number of mice; ns = not significant; \*  $p < 0.05$ , \*\*  $p < 0.01$ , \*\*\*  $p < 0.001$ ; SEM = Standard Error of Mean; scale bar = 25  $\mu$ m.

**Figure S8 – Axl-148b conjugate is not toxic for mice.** (A-C) Mice were injected with Red fluorescent (RFP-expressing) 4175-TGL cells and treated as described in Figure 5A. Liver (A), spleen (B) and kidneys (C) were weighted at day 32 (final point) and FFPE sections stained with

H&E. Representative H&E pictures (bar=100 or 200  $\mu\text{m}$ ) are shown on top of box-and-whiskers plots representing the mean $\pm$ SEM of organ weights for the indicated number (n) of mice. ns = not significant; SEM= Standard Error of Mean; H&E = Hematoxylin & Eosin; FFPE: Formalin-Fixed, Paraffin Embedded; mg = milligrams.

Table S1

| <b>A549</b> | ctrl          | axl           | axl-148b       | scr-148b       | pre-ctrl       | pre-148b       |
|-------------|---------------|---------------|----------------|----------------|----------------|----------------|
| miR-148b-3p | 31.616 ± 0.26 | 31.86 ± 0,11  | 25.602 ± 0.031 | 32.693 ± 0.243 | 33.555 ± 0.516 | 24.991 ± 0.079 |
| U44         | 26.542 ± 0.06 | 27.51 ± 0.115 | 26.331 ± 0.145 | 28.492 ± 0.048 | 28.042 ± 0.058 | 27.446 ± 0.036 |
| ΔCt         | 5.074 ± 0.267 | 4.35 ± 0.159  | -0.729 ± 0.148 | 4.201 ± 0.248  | 5.5132 ± 0.519 | -2.455 ± 0.087 |

| <b>4175-TGL</b> | ctrl           | axl            | axl-148b       | scr-148b       | pre-ctrl       | pre-148b       |
|-----------------|----------------|----------------|----------------|----------------|----------------|----------------|
| miR-148b-3p     | 33.536 ± 0.467 | 33.644 ± 0.676 | 29.656 ± 0.054 | 33.49 ± 0.257  | 33.697 ± 0.412 | 21.668 ± 0.033 |
| U44             | 30.273 ± 0.14  | 30.338 ± 0.177 | 31.998 ± 0.18  | 30.501 ± 0.014 | 27.564 ± 0.186 | 26.898 ± 0.111 |
| ΔCt             | 3.263 ± 0.487  | 3.306 ± 0.699  | -2.342 ± 0.188 | 2.989 ± 0.257  | 6.133 ± 0.452  | -5,23 ± 0.116  |

| <b>MA-2</b> | ctrl           | axl            | axl-148b       | scr-148b       | pre-ctrl       | pre-148b       |
|-------------|----------------|----------------|----------------|----------------|----------------|----------------|
| miR-148b-3p | 31.976 ± 0.032 | 32.376 ± 0.041 | 30.079 ± 0.11  | 32.013 ± 0.146 | 33.199 ± 0.166 | 24.929 ± 0.31  |
| U44         | 24.994 ± 0.044 | 24.974 ± 0.039 | 25.691 ± 0.068 | 24.829 ± 0.013 | 25.178 ± 0.076 | 25.563 ± 0.056 |
| ΔCt         | 6,982 ± 0.054  | 7.402 ± 0.056  | 4.388 ± 0.129  | 7.184 ± 0.146  | 8.021 ± 0.182  | -0.634 ± 0.315 |

| <b>SKBR3</b> | ctrl           | axl            | axl-148b       | scr-148b       | pre-ctrl       | pre-148b       |
|--------------|----------------|----------------|----------------|----------------|----------------|----------------|
| miR-148b-3p  | 32.901 ± 0.038 | 32.941 ± 0.163 | 33.389 ± 0.218 | 33.196 ± 0.562 | 28.653 ± 0.324 | 18.052 ± 0.21  |
| U44          | 27.386 ± 0.092 | 27.55 ± 0.501  | 27.648 ± 0.084 | 27.929 ± 0.267 | 27.167 ± 0.023 | 27.28 ± 0.294  |
| ΔCt          | 5.515 ± 0.099  | 5.391 ± 0.527  | 5.741 ± 0.234  | 5.267 ± 0.622  | 1.486 ± 0.325  | -9.228 ± 0.361 |

Fig. S1

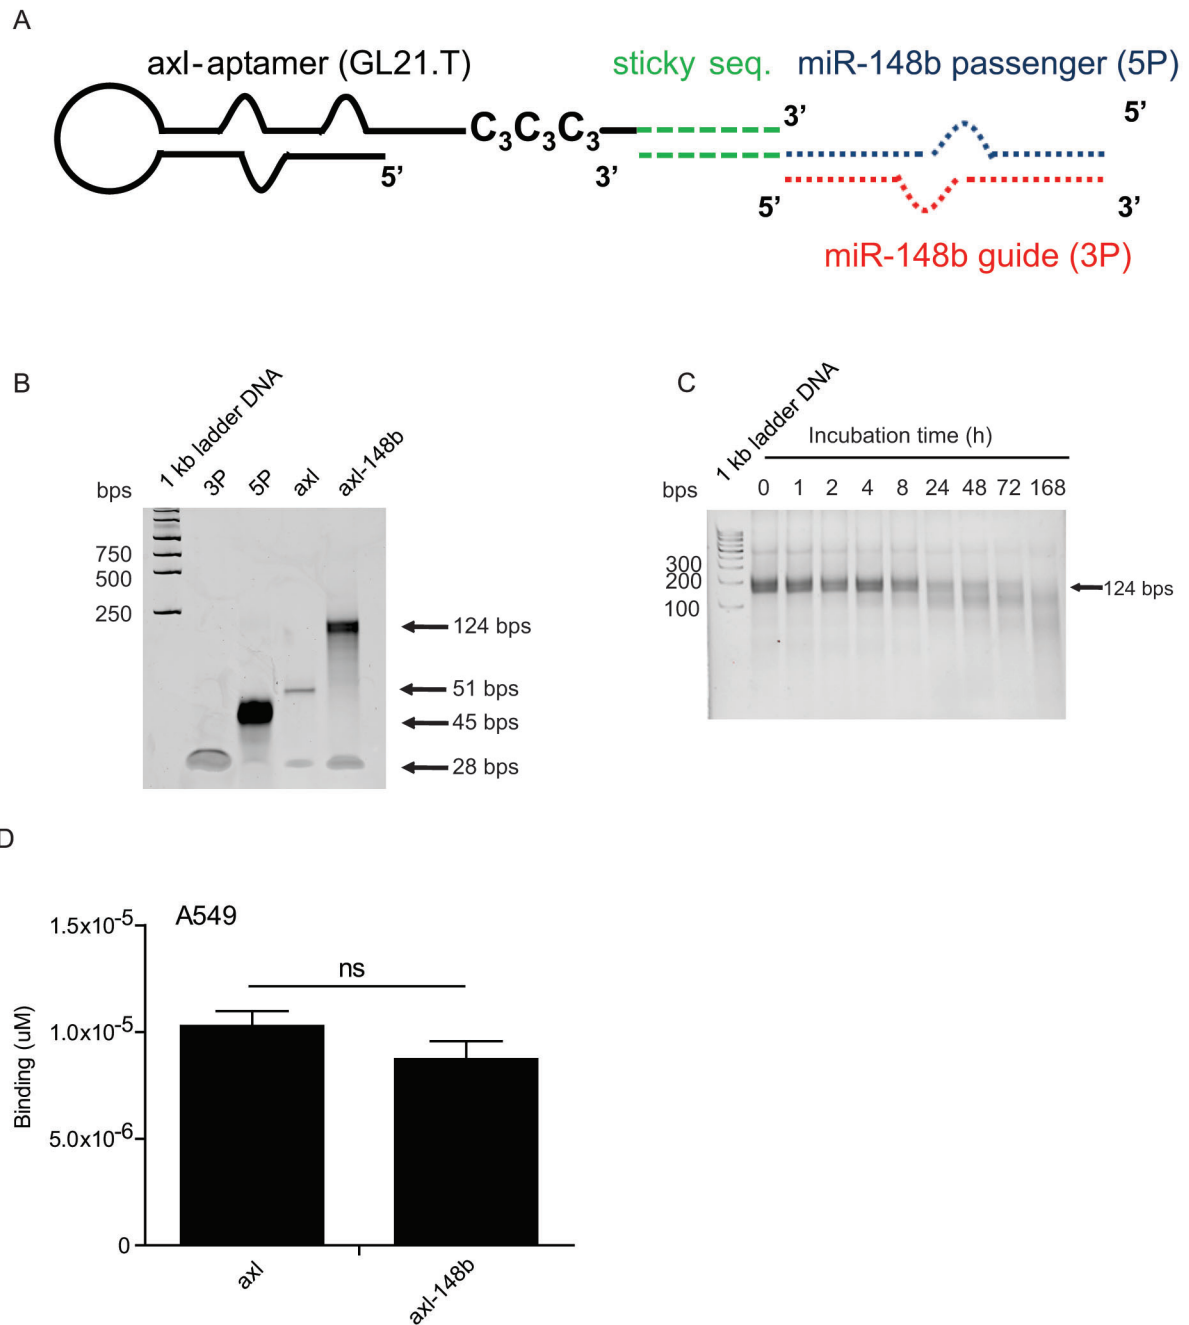

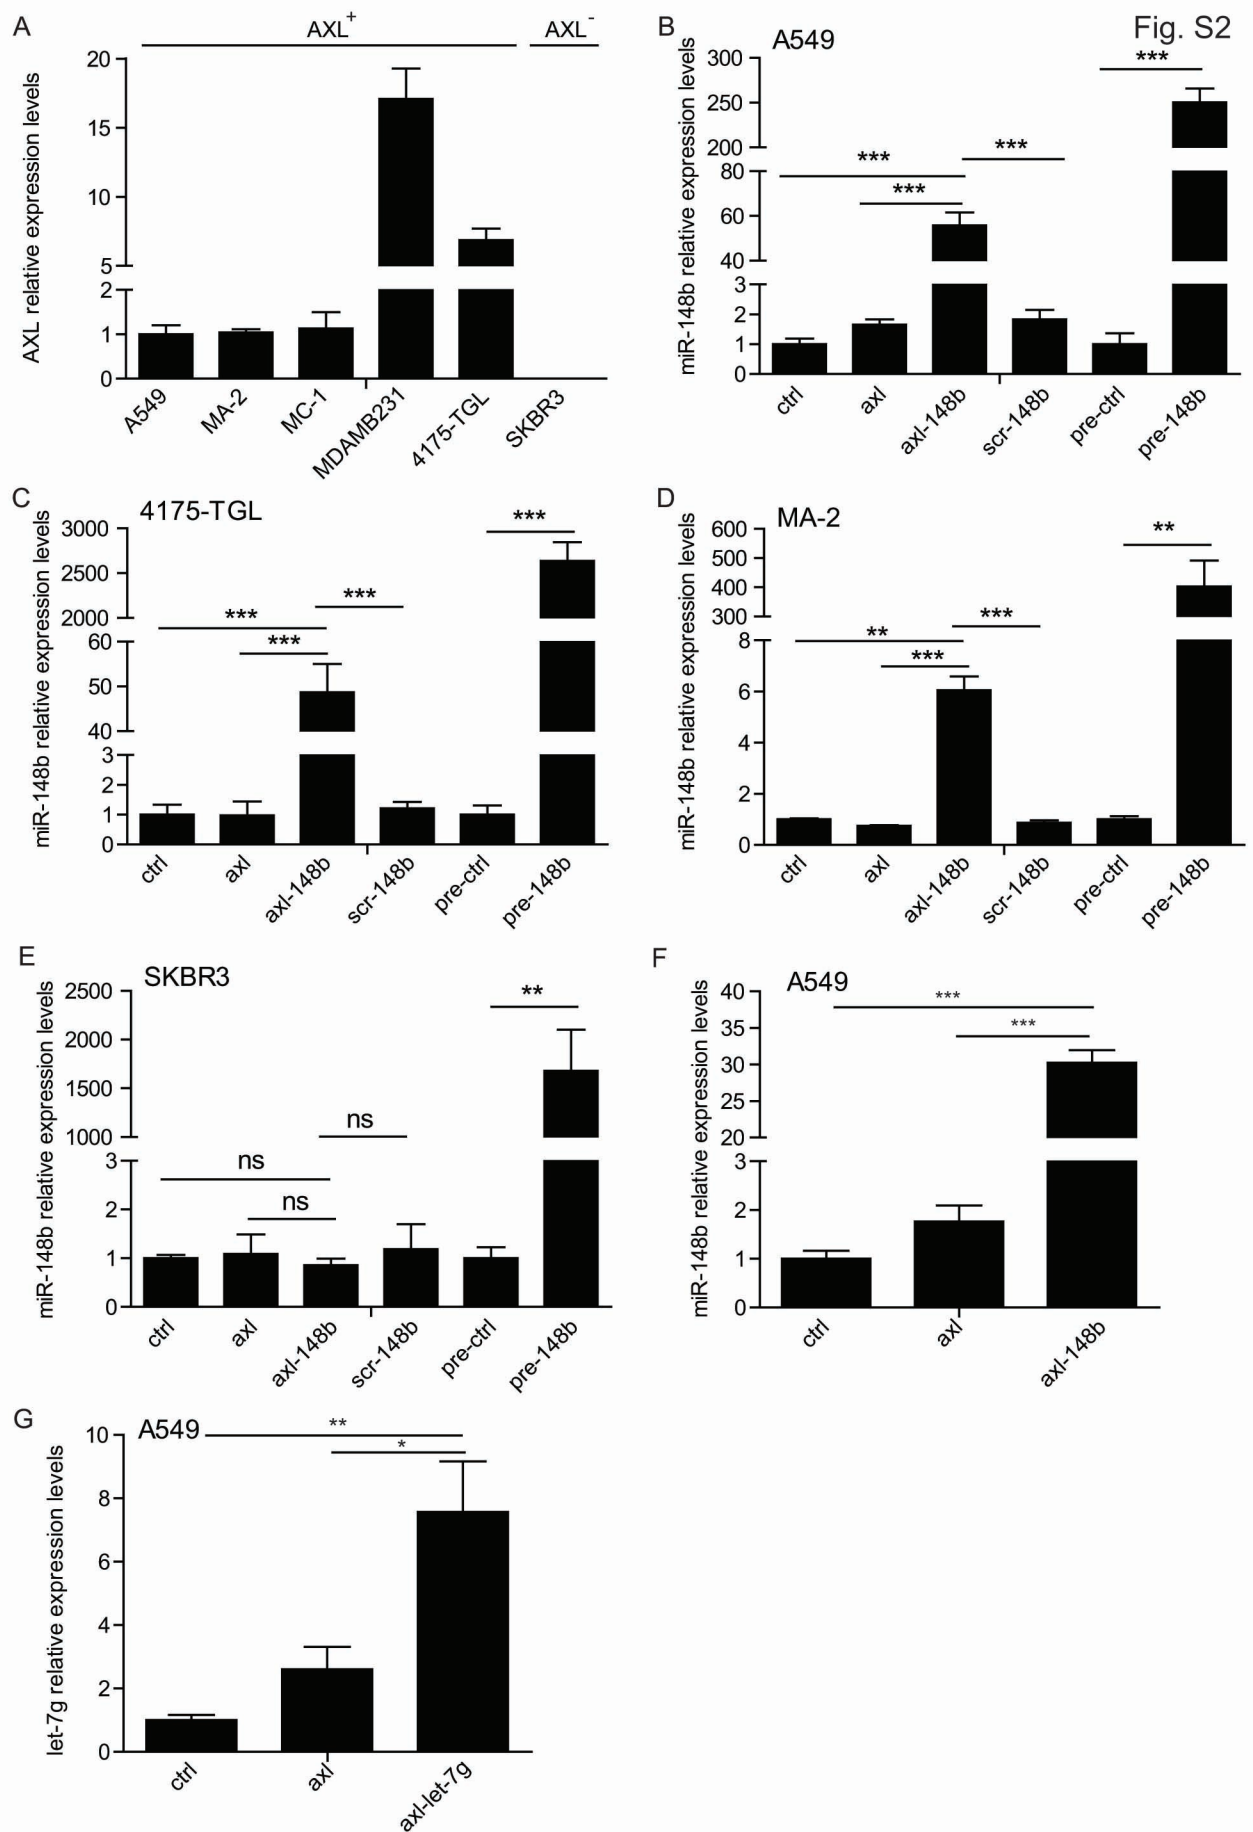

Fig. S3

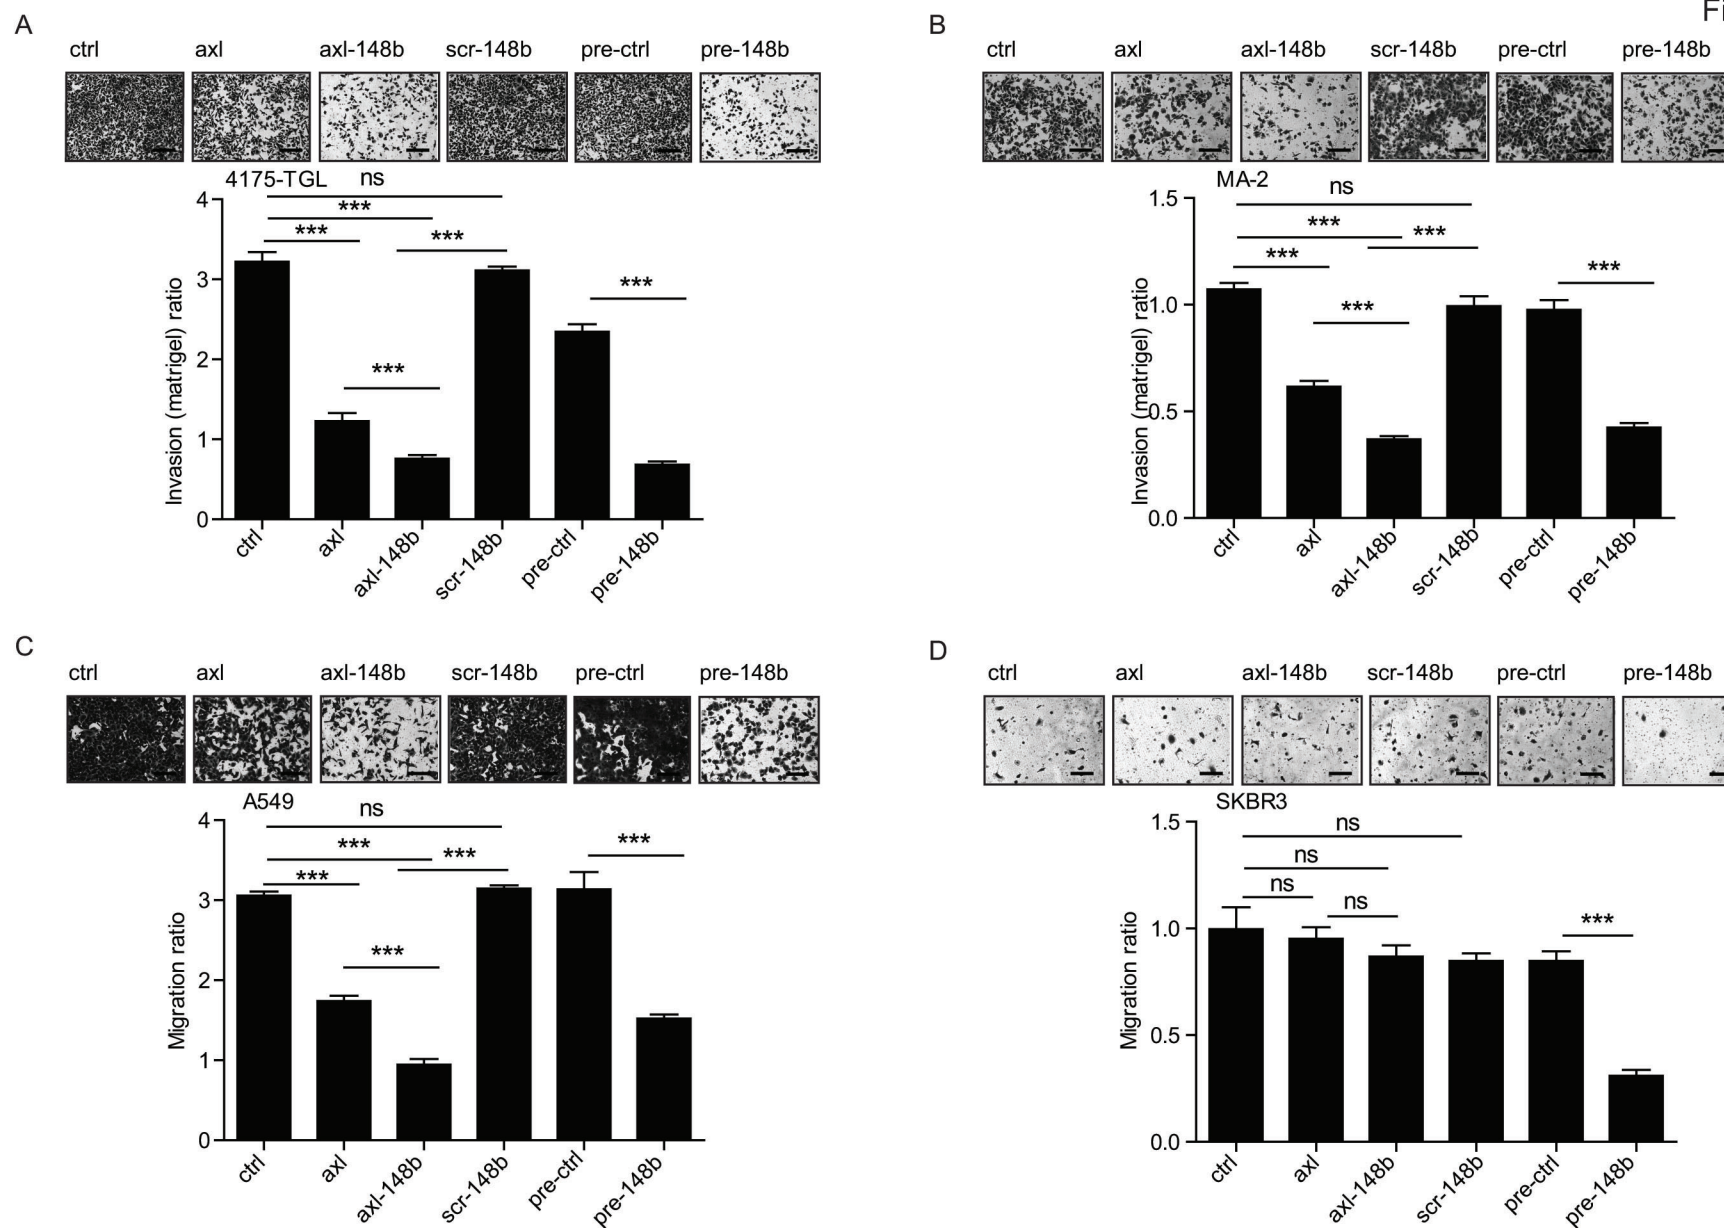

Fig. S4

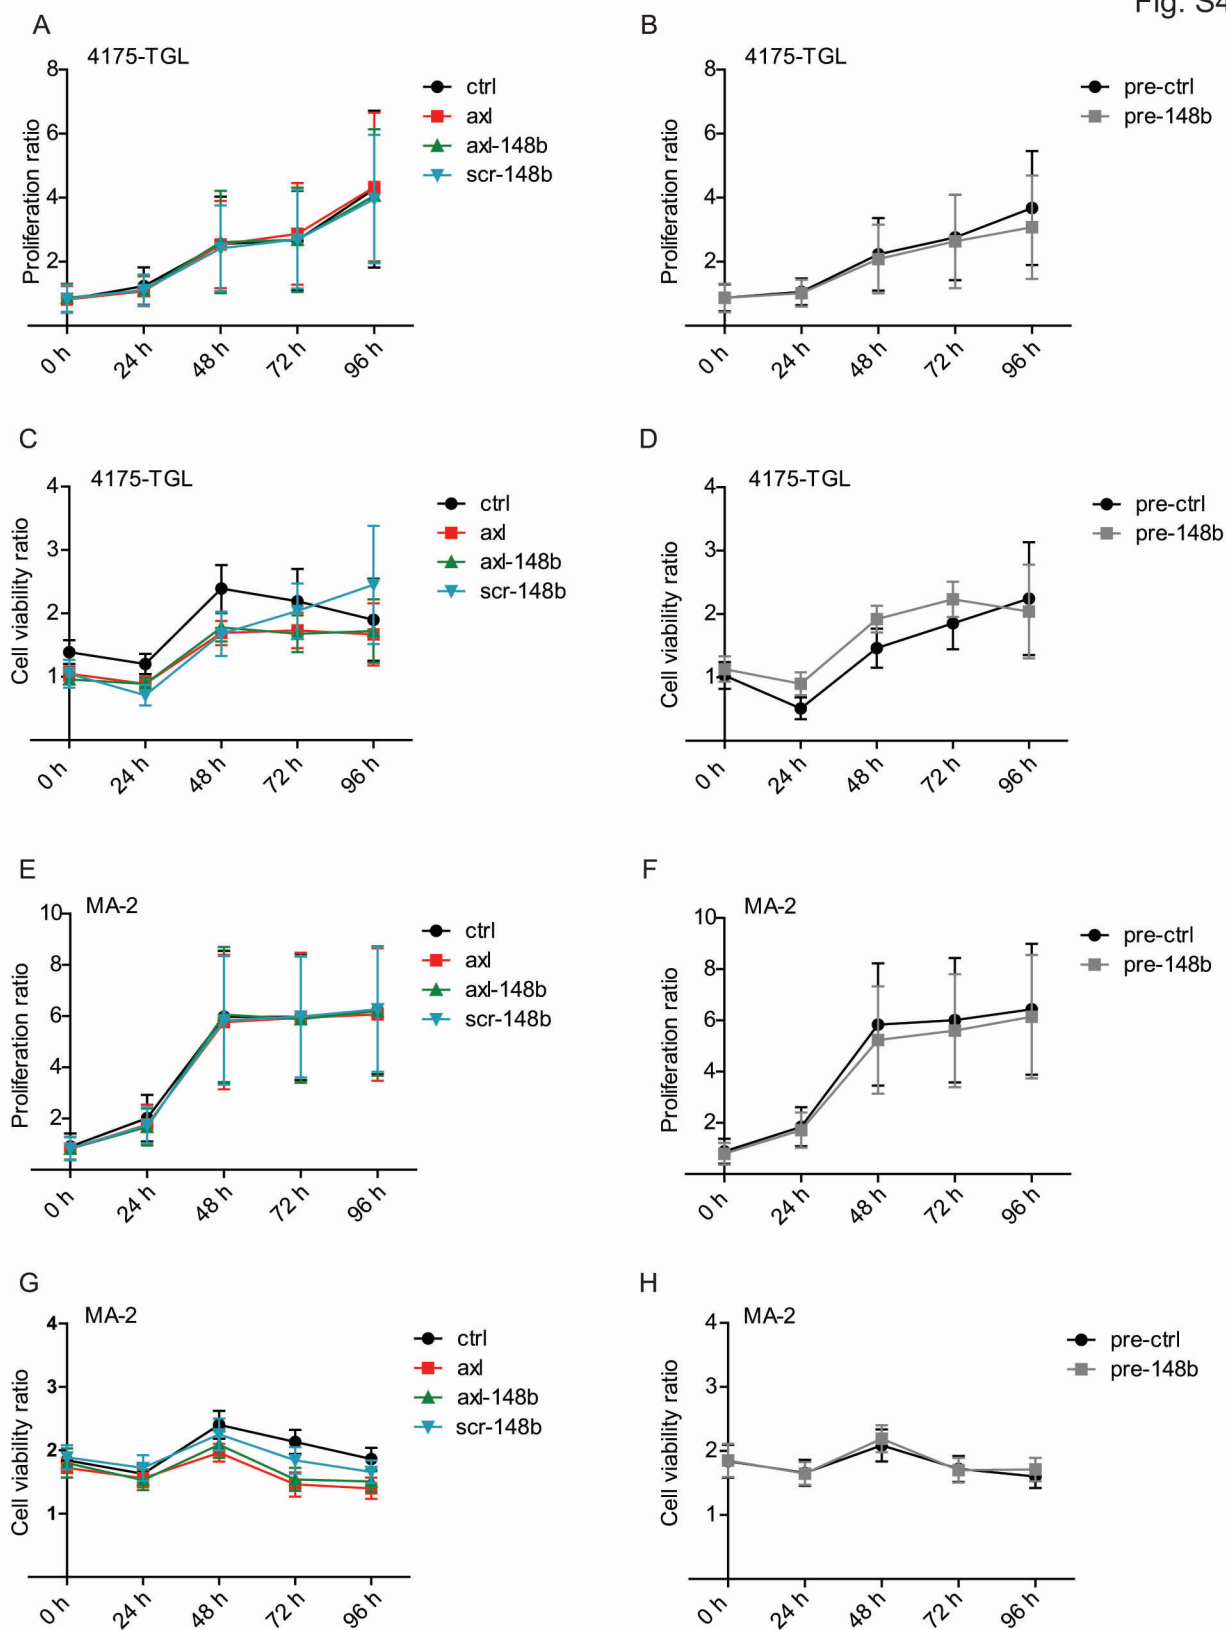

Fig. S5

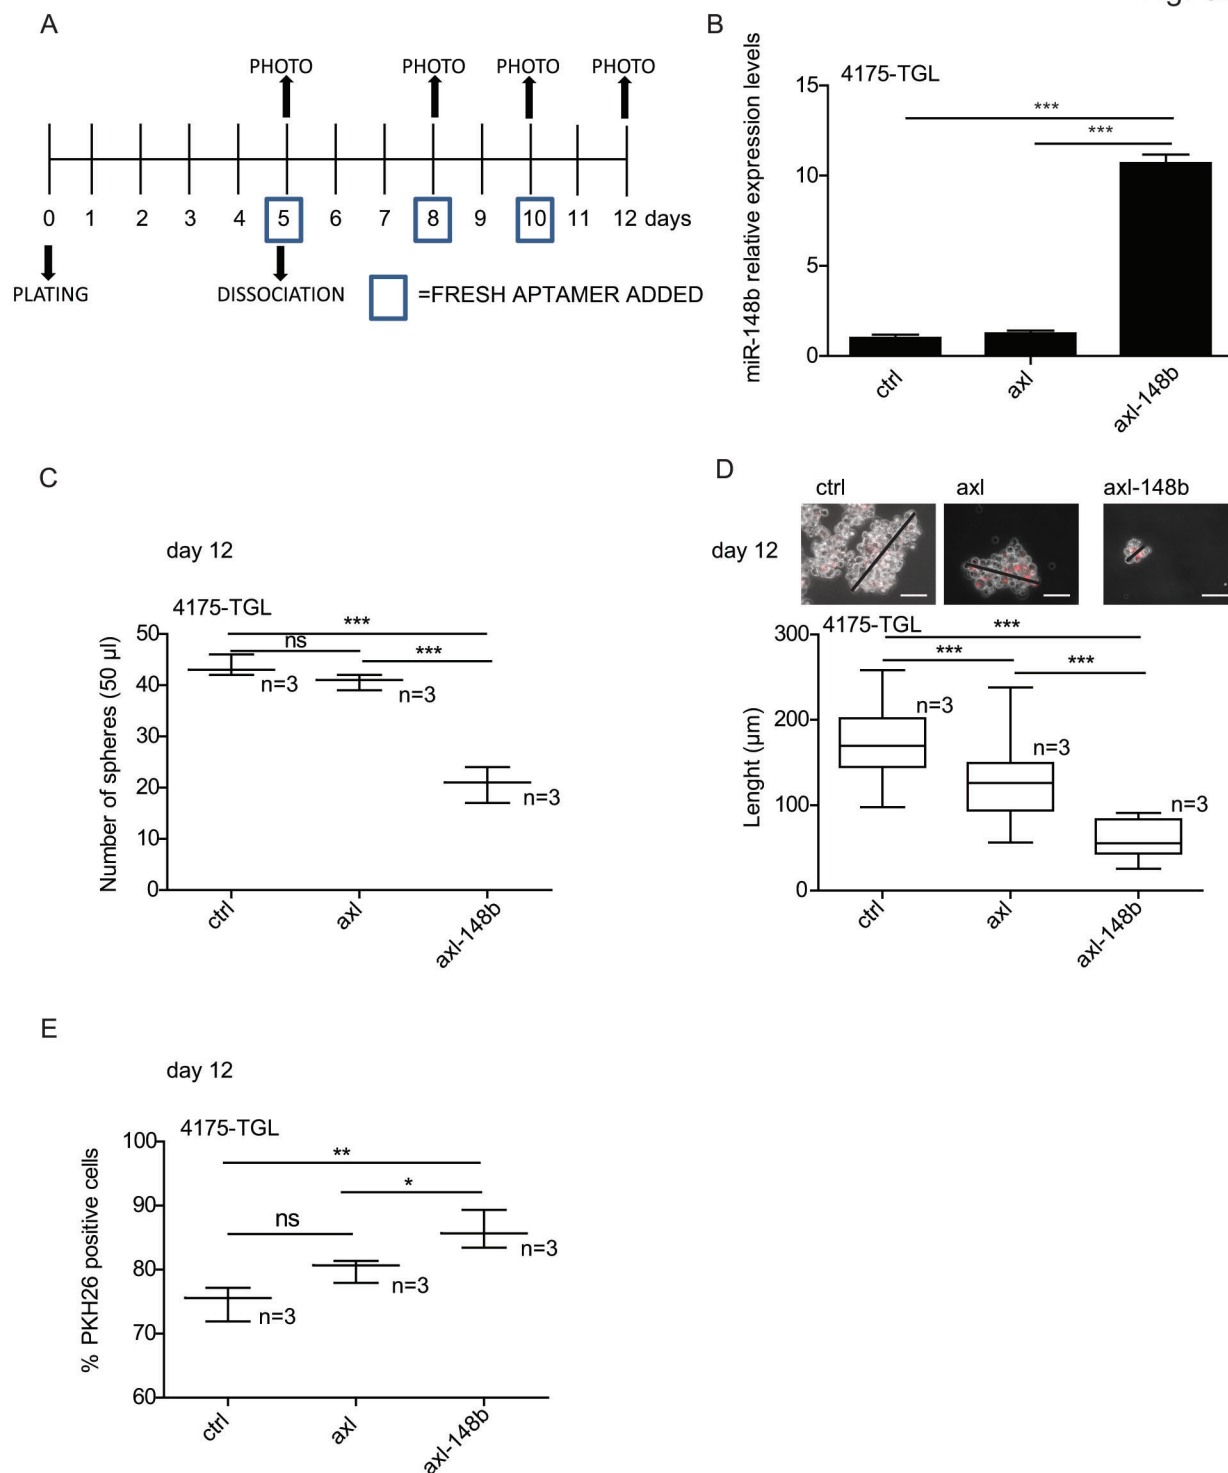

Fig. S6

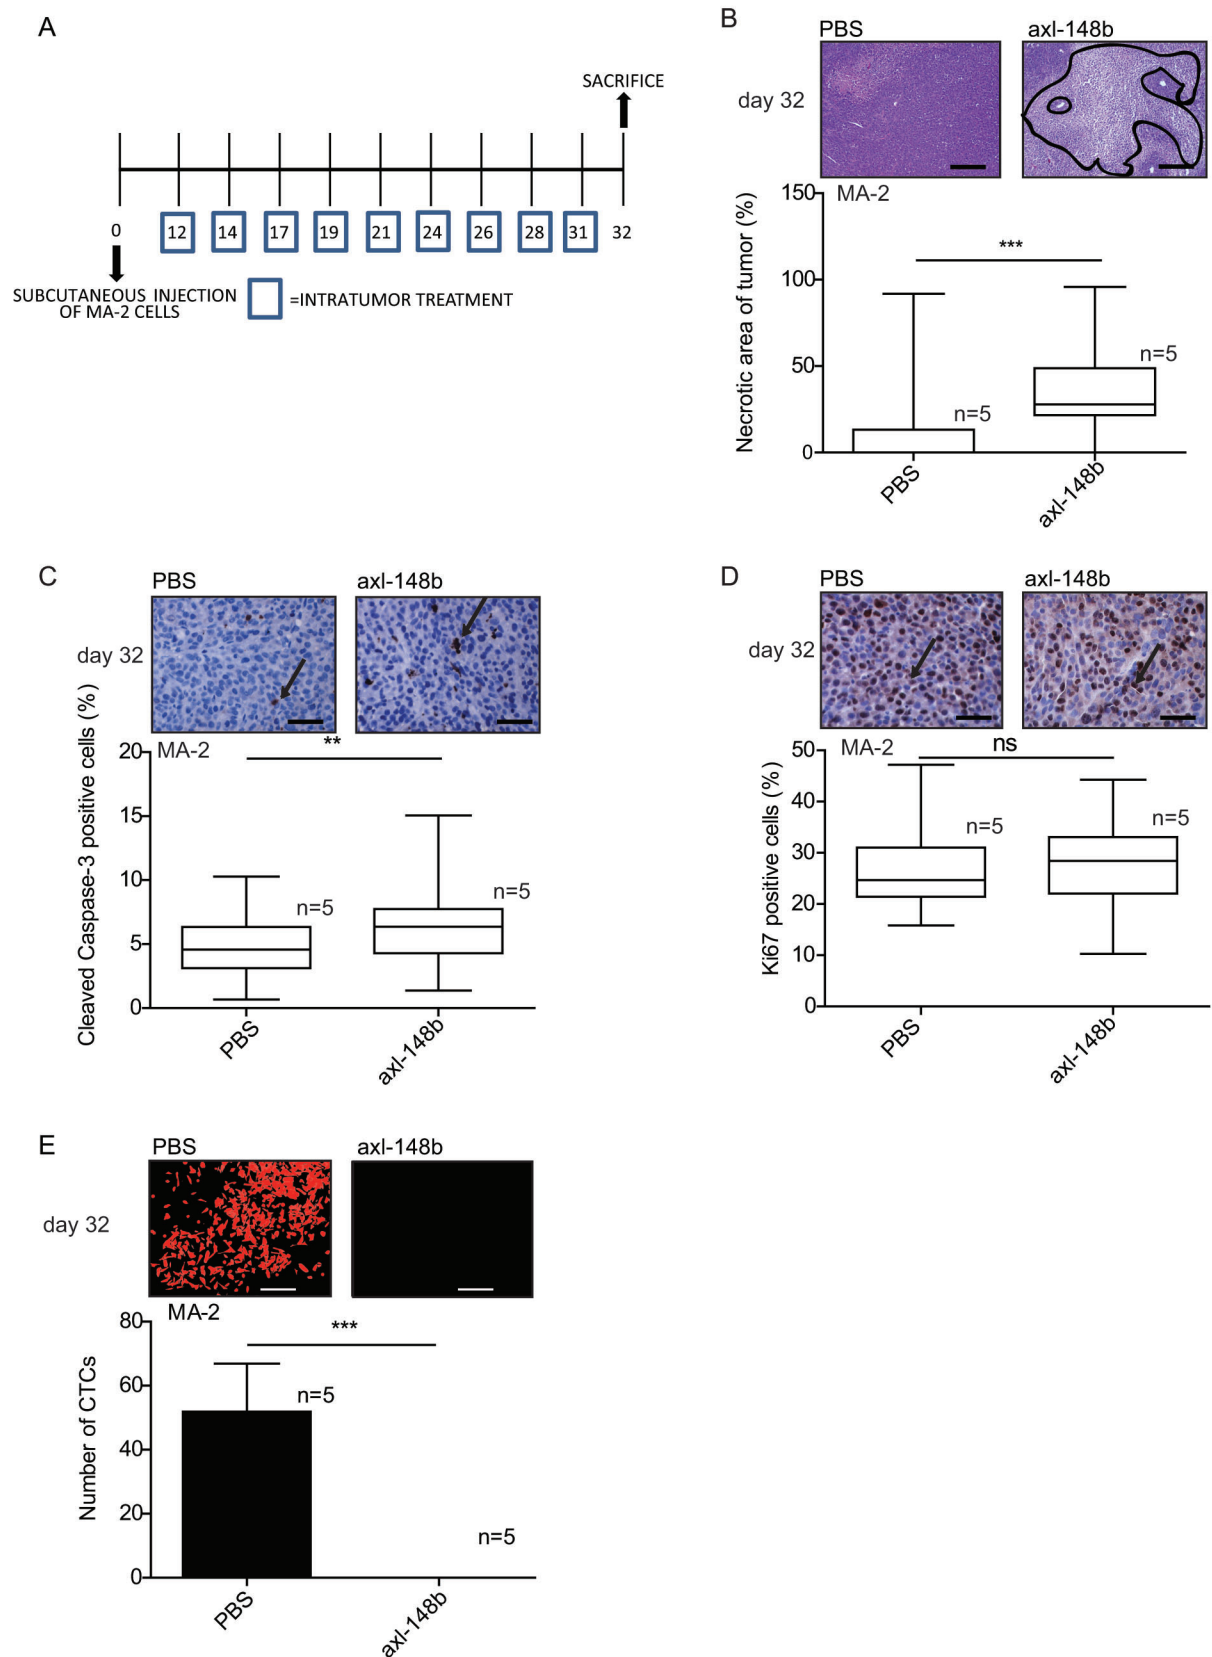

Fig. S7

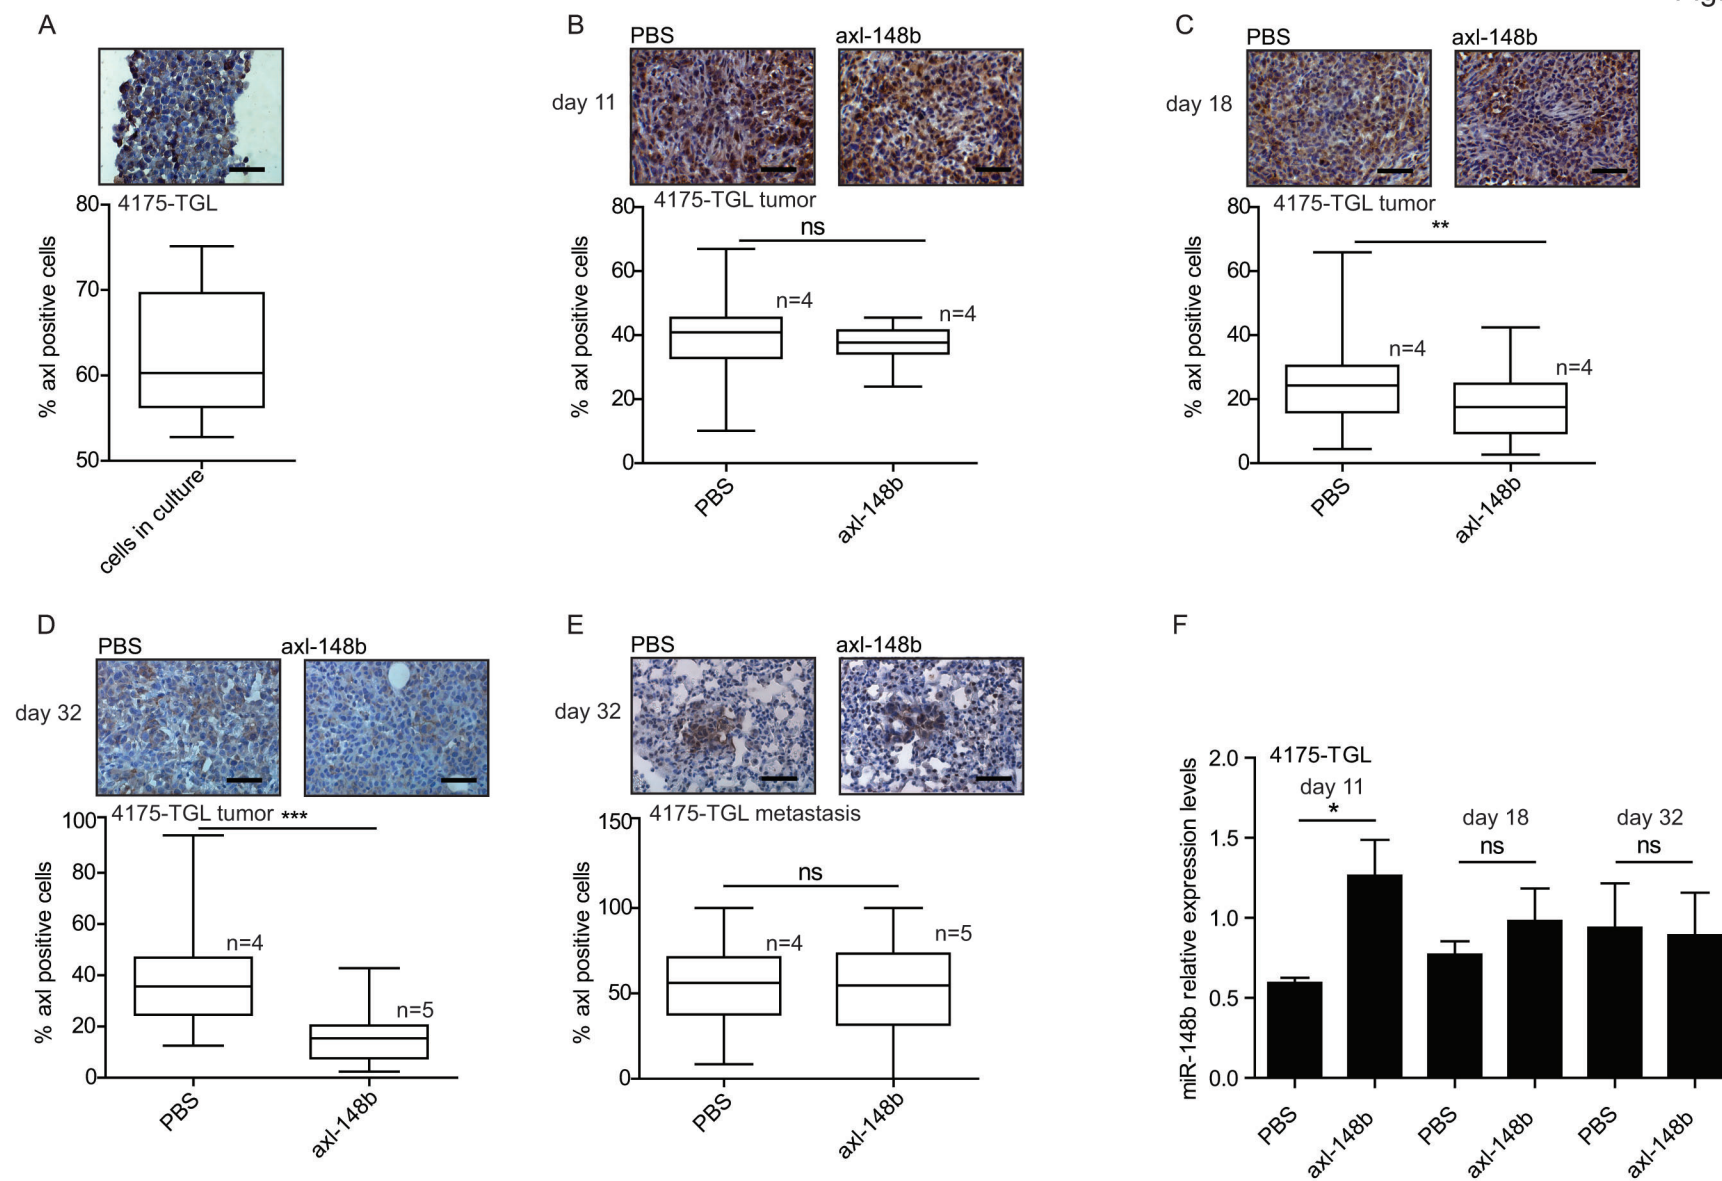

Fig. S8

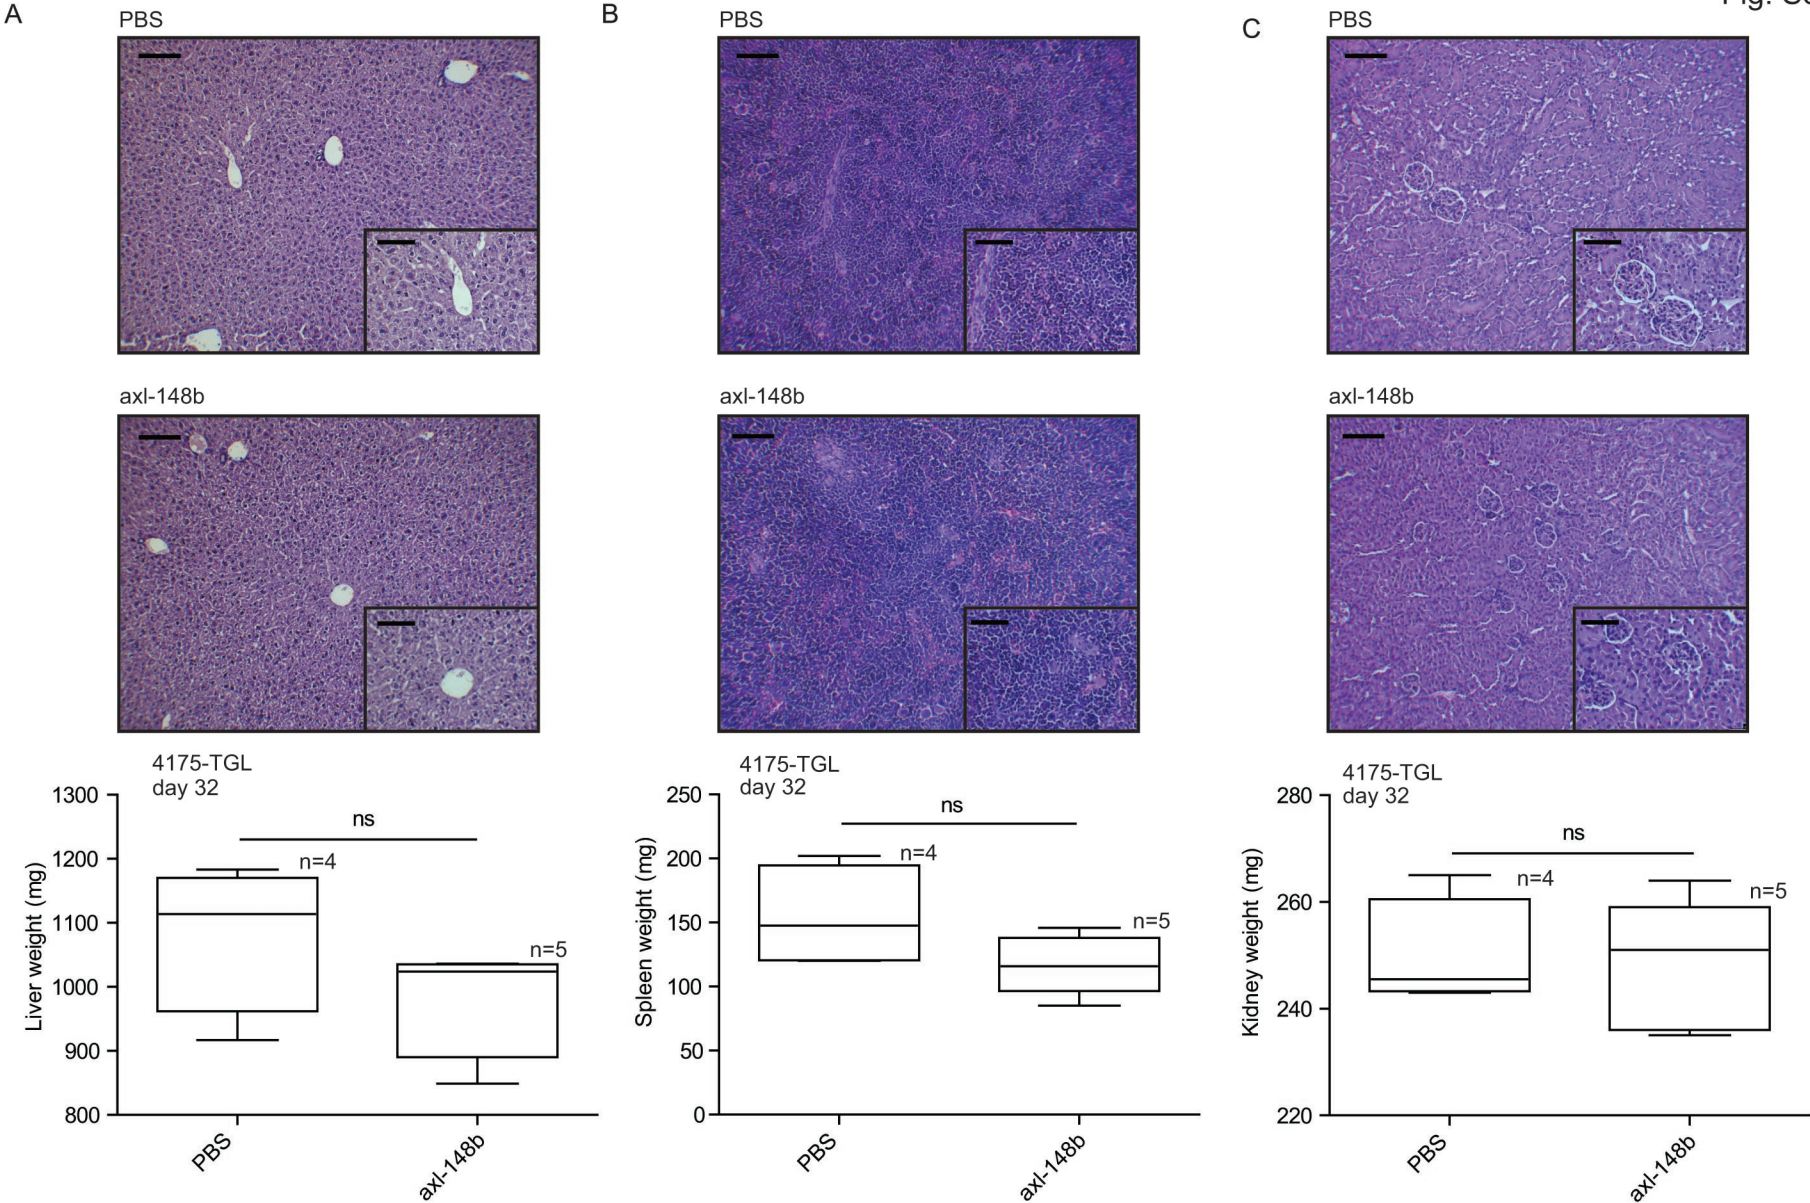

Supplement: Supplementary file 1 — Supplementary figures and table. [file ijbsv16p1238s1.pdf]
